# Supplementary material
Source: PubMed Central journal article supplement (PMC6380951)
Supplement: NIHMS1512113-supplement-1.pdf [file NIHMS1512113-supplement-1.pdf]

**Supplemental Table 1.** PFAS acronyms used for the study

| <b>Abbreviation</b> | <b>Chemical name</b>                                                             | <b>CAS No.</b> |
|---------------------|----------------------------------------------------------------------------------|----------------|
| <b>PFDeA</b>        | Pefluorodecanoic acid                                                            | 335-76-2       |
| PFDoA               | Perfluorododecanoic acid                                                         | 307-55-1       |
| <b>PFHpA</b>        | Perfluoroheptanoic acid                                                          | 375-85-9       |
| PFHxS               | Perfluorohexane sulfonic acid                                                    | 355-46-4       |
| PFNA                | Perfluorononanoic acid                                                           | 375-95-1       |
| PFOA                | Linear and branched isomers<br>perfluorooctanoate                                | 335-67-1       |
| PFOS                | Linear and monomethyl<br>branched isomers<br>perfluorooctane sulfonate<br>(PFOS) | 1763-23-1      |
| PFUA                | Perfluoroundecanoic acid                                                         | 2058-94-8      |

**Supplemental Table 2.** Geometric Mean of serum PFNA serum (in ng/ml) among the 21 children

|                 | <b>Geometric Mean [95% CI]</b> |
|-----------------|--------------------------------|
| All             | 2.44 (1.69,3.51)               |
| 25th percentile | 1.64 (0.53,2.75)               |
| 50th percentile | 2.85 (1.97,3.73)               |
| 75th percentile | 3.31 (2.19,4.43)               |
| Sex             |                                |
| Male (n=14)     | 2.84 (1.99,4.04)               |
| Female (n=7)    | 2.05 (1.09,3.83)               |
| Race            |                                |
| Hispanic (n=6)  | 1.96 (1.10,3.50)               |
| NHWhite (n=5)   | 3.42 (2.44,4.80)               |
| NHBlack (n=10)  | 2.37 (1.35,4.16)               |
